### Impact of diabetes on outcome with drug-coated balloons versus drug-eluting stents: the BASKET-SMALL 2 trial

J. Wohrle<sup>1</sup>, B. Scheller<sup>2</sup>, J. Seeger<sup>1</sup>, A. Farah<sup>3</sup>, A. Ohlow<sup>4</sup>, N. Mangen<sup>5</sup>, S. Moebius-Winkler<sup>6</sup>, D. Weilenmann<sup>7</sup>, G. Stachel<sup>8</sup>, G. Leibundgut<sup>9</sup>, P. Rickenbacher<sup>10</sup>, M. Cattaneo<sup>10</sup>, N. Gilgen<sup>10</sup>, C. Kaiser<sup>10</sup>, R.V. Jeger<sup>10</sup>

<sup>1</sup>Medical Campus Lake Constance, Friedrichshafen, Germany; <sup>2</sup>University Hospital Saarland, Homburg, Germany; <sup>3</sup>Knappschafts-Krankenhaus Klinikum Westfalen, Dortmund, Germany; <sup>4</sup>Hospital SRH Gera, Gera, Germany; <sup>5</sup>Heart Center - University Hospital Dresden, Dresden, Germany; <sup>6</sup>University Hospital Jena, Jena, Germany; <sup>7</sup>Cantonal Hospital St Gallen, St. Gallen, Switzerland; <sup>8</sup>Heart Center of Leipzig, Leipzig, Germany; <sup>9</sup>Cantonal Hospital Baselland, Liestal, Switzerland; <sup>10</sup>University Hospital Basel, Basel, Switzerland  
On behalf of BASKET-SMALL 2

**Funding Acknowledgement:** Type of funding sources: Foundation. Main funding source(s): Schweizerischer Nationalfonds zur Förderung der Wissenschaftlichen Forschung, Basel Cardiovascular Research Foundation, and B Braun Medical AG.

**Objectives:** To evaluate the impact of diabetes mellitus on 3 year clinical outcome in patients undergoing drug-coated balloon (DCB) or drug-eluting stent (DES) treatment for de-novo lesions.

**Background:** For the treatment of de-novo coronary small vessel disease DCB are non-inferior to DES regarding clinical outcome up to 3 years.

**Methods:** In this prespecified analysis of a multicenter, randomized, non-inferiority trial, including 758 patients with de-novo lesions in coronary vessels <3mm who were randomized 1:1 to DCB (n=382) or DES (n=376) and followed over 3 years for major adverse cardiac events (MACE: cardiac death, non-fatal myocardial infarction [MI], and target-vessel revascularization [TVR]), outcome was analyzed regarding the presence or absence of diabetes mellitus.

**Results:** In non-diabetic patients (n=506) rates of MACE (13.0% vs. 11.5%, hazard ratio [HR] 1.24, 95% confidence interval [CI] 0.73–2.09,

p=0.43), cardiac death (2.8% vs. 2.9%, HR 0.97, 95% CI 0.32–2.92, p=0.96), non-fatal MI (5.1% vs. 4.8%, HR 1.00, 95% CI 0.44–2.28, p=0.99), and TVR (8.8% vs. 6.1%, HR 1.64, 95% CI 0.83–3.25, p=0.16) were similar in DCB and DES. In diabetic patients (n=252) rates of MACE (19.3% vs. 22.2%, HR 0.82, 95% CI 0.45–1.48, p=0.51), cardiac death (8.8% vs. 5.9%, HR 2.01, 95% CI 0.76–5.31, p=0.16), non-fatal MI (7.1% vs. 9.8%, HR 0.55, 95% CI 0.21–1.49, p=0.24) were similar in DCB and DES, whereas TVR was significantly lower with DCB compared to DES (9.1% vs. 15.0%, HR 0.40, 95% CI 0.17–0.94, p=0.036). In addition, need for TVR was highest in diabetic patients treated with DES (Picture 1).

**Conclusions:** The rates of MACE are similar in DCB and DES in de-novo coronary lesions of diabetic and non-diabetic patients. In diabetic patients the need for TVR was significantly lower with DCB compared to DES.

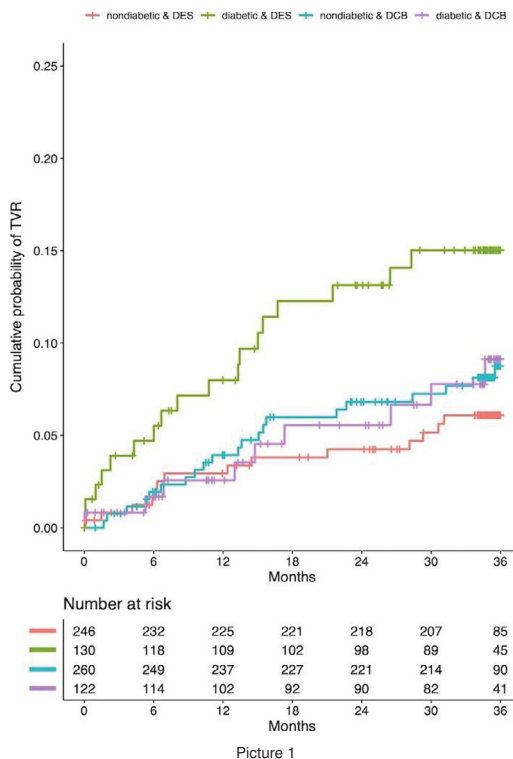

Source: http://academic.oup.com/eurheartj/article-pdf/42/Supplement_1/ehab724.2107/40589424/ehab724.2107.pdf
